# Supplementary material for: Noble metal-modified faceted anatase titania photocatalysts: Octahedron versus decahedron
Source: PubMed Central journal article supplement (PMC6100264; doi:10.1016/j.apcatb.2018.06.027), 2018-12-05
Supplement: mmc1.pdf [file mmc1.pdf]

# Noble Metal-Modified Faceted Anatase Titania Photocatalysts: Octahedron versus Decahedron

Zhishun Wei,<sup>a,b</sup> Marcin Janczarek,<sup>b,c</sup> Maya Endo,<sup>b</sup> Kunlei Wang,<sup>b</sup> Armandas Balčytis,<sup>d</sup> Akio Nitta,<sup>b</sup>  
Maria G. Méndez-Medrano,<sup>e</sup> Christophe Colbeau-Justin,<sup>e</sup> Saulius Juodkazis,<sup>d</sup> Bunsho Ohtani,<sup>b</sup>  
Ewa Kowalska<sup>b,\*</sup>

<sup>a</sup> Hubei Provincial Key Laboratory of Green Materials for Light Industry, Hubei University of Technology, Wuhan 430068, China

<sup>b</sup> Institute for Catalysis, Hokkaido University, N21, W8, 001-0021 Sapporo, Japan

<sup>c</sup> Department of Chemical Technology, Gdansk University of Technology, G. Narutowicza 11/12, 80-233 Gdansk, Poland

<sup>d</sup> Center for Micro-Photonics, Swinburne University of Technology, John St., Hawthorn 3122 Vic, Australia

<sup>e</sup> Laboratory of Physical Chemistry, UMR 8000, University of Paris-Saclay, 91405 Orsay, France

\* Corresponding author, Tel.: 81-11-706-9130; fax: 81-11-706-9133.

E-mail address: kowalska@cat.hokudai.ac.jp

## Figures and Tables

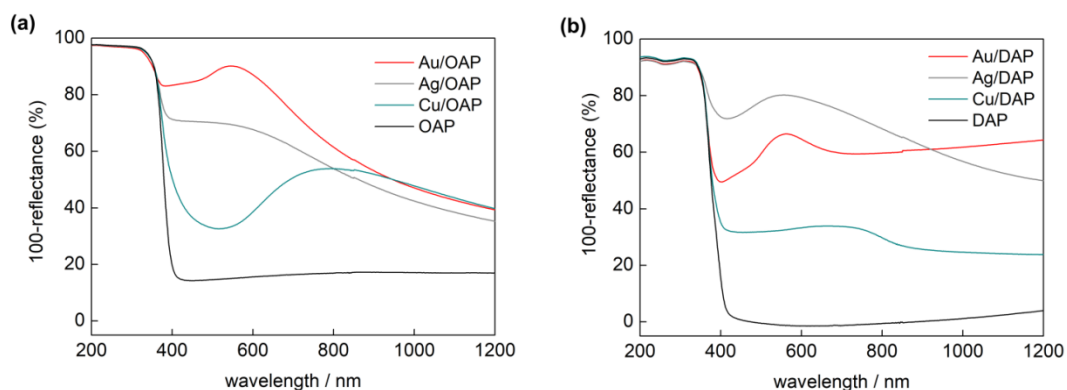

Figure S1. DRS spectra of bare and modified OAP (a) and DAP (b) samples taken with BaSO<sub>4</sub> as reference.

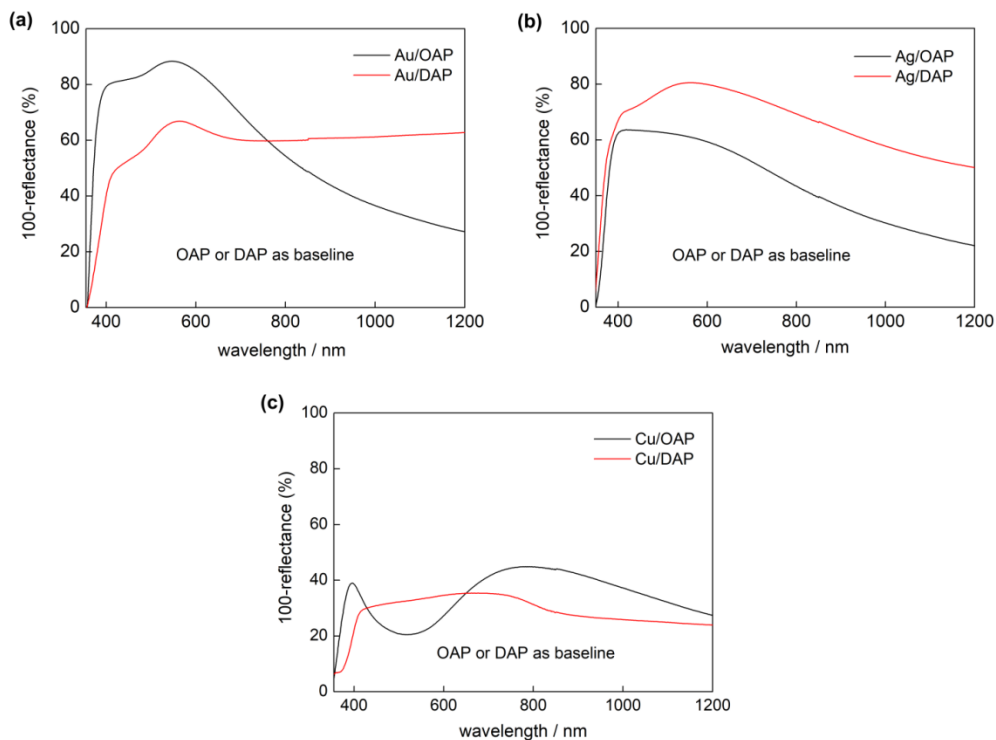

**Figure S2.** DRS spectra of faceted titania (OAP and DAP) modified with (a) gold, (b) silver and (c) copper taken with bare faceted titania as reference.

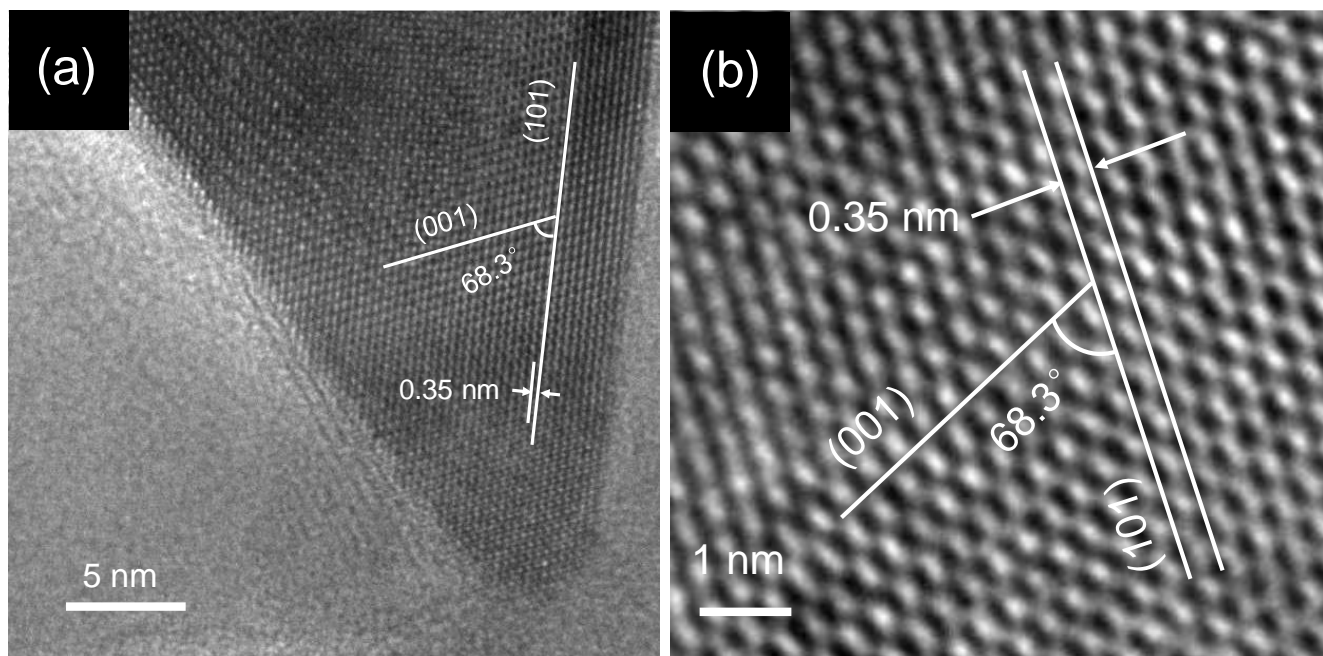

**Figure S3.** HR-TEM images of OAP for lower (a) and higher (b) resolution modes (0.35-nm lattice distance between fringes and 68.3° angle between {001} and {101} facets correspond to single anatase crystals).

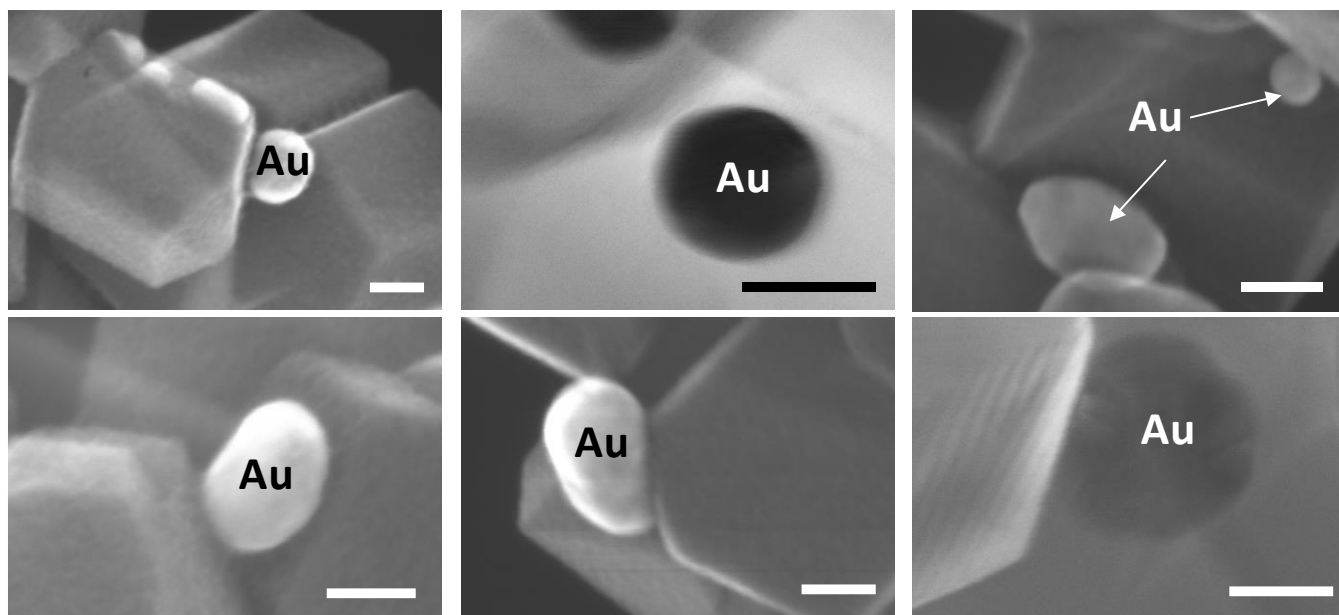

**Figure S4.** STEM images of Au/DAP (All scale bars correspond to 20 nm).

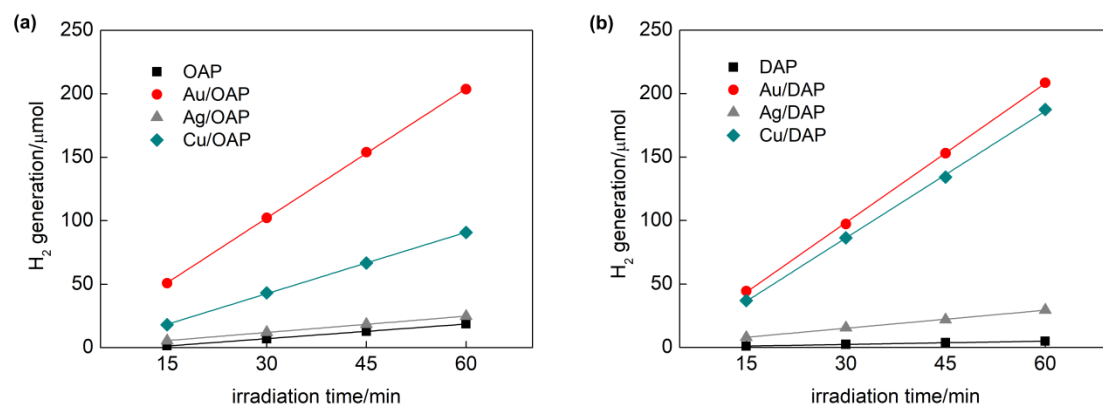

**Figure S5.** Photocatalytic activity for methanol dehydrogenation on bare and metal-modified OAP (a) and DAP (b).

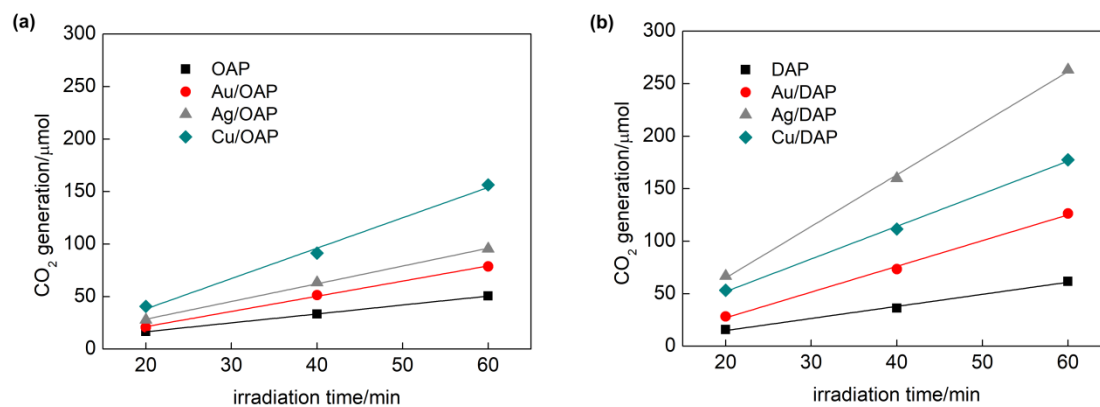

**Figure S6.** Photocatalytic activity for decomposition of acetic acid on bare and metal-modified OAP (a) and DAP (b).

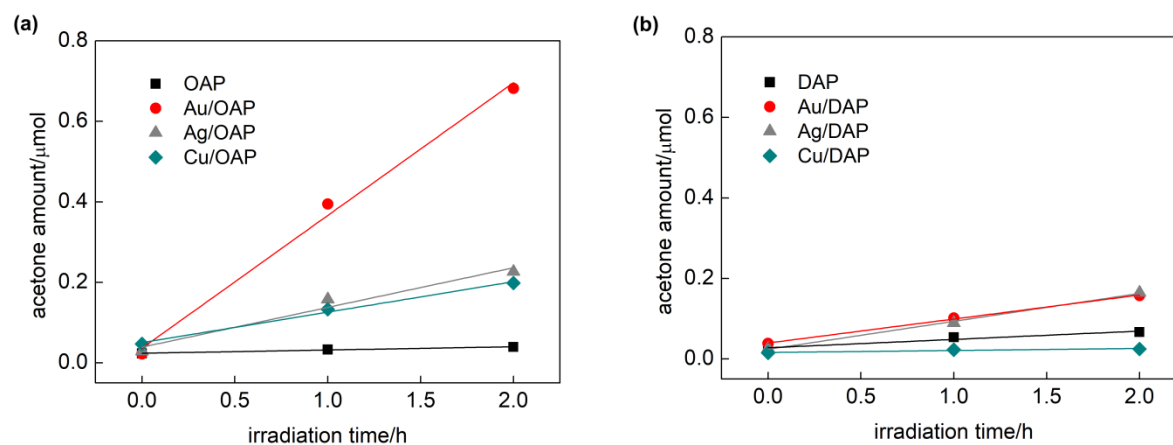

**Figure S7.** Photocatalytic activity for oxidation of 2-propanol on bare and metal-modified OAP (a) and DAP (b).

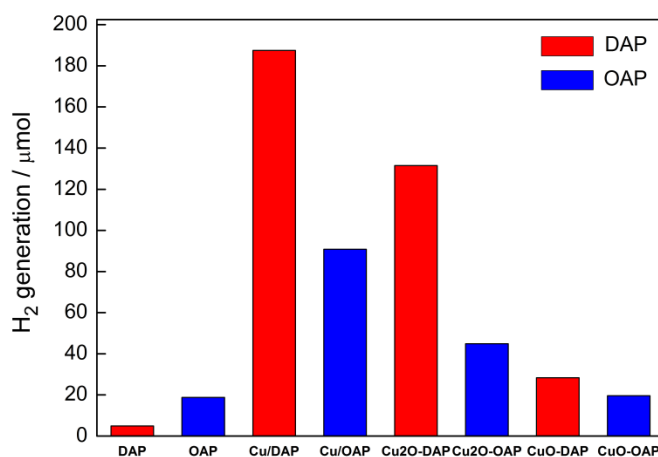

**Figure S8.** Comparison of photocatalytic activity for methanol dehydrogenation on bare, Cu/OAP, Cu/DAP and physical mixtures of copper oxides ( $\text{Cu}_2\text{O}$  and  $\text{CuO}$ ) and titania ( $\text{Cu}_2\text{O}$ -OAP,  $\text{CuO}$ -OAP,  $\text{Cu}_2\text{O}$ -DAP and  $\text{CuO}$ -DAP) under UV/vis irradiation.

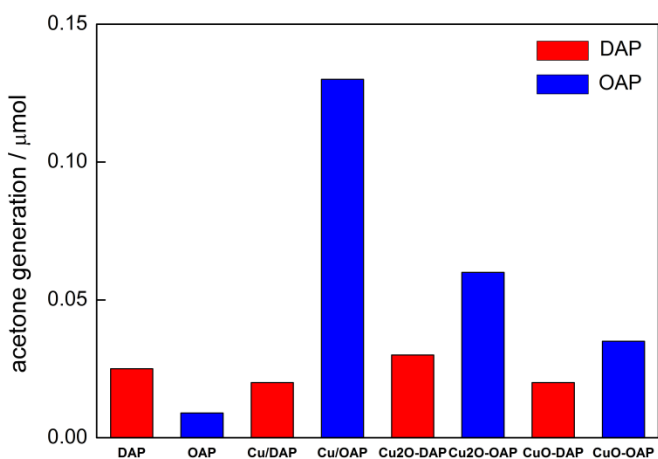

**Figure S9.** Comparison of photocatalytic activity for oxidation of 2-propanol on bare, Cu/OAP, Cu/DAP and physical mixtures of copper oxides ( $\text{Cu}_2\text{O}$  and  $\text{CuO}$ ) and titania ( $\text{Cu}_2\text{O}$ -OAP,  $\text{CuO}$ -OAP,  $\text{Cu}_2\text{O}$ -DAP and  $\text{CuO}$ -DAP) under vis irradiation.
